# Supplementary material for: Combined effects of prevention and quarantine on a breakout in SIR model
Source: PubMed Central journal article supplement — Sci Rep. 2011 Jun 14;1:10. doi: 10.1038/srep00010 (PMC3216498; doi:10.1038/srep00010), 2011-06-14
Supplement: srep00010-s1.pdf [file srep00010-s1.pdf]

Additional Information for Fuminori Kato, Kei-ichi Tainaka, Shogo Sone, Satoru Morita, Hiroyuki Iida, and Jin Yoshimura. Combined effects of prevention and quarantine on a breakout in SIR model.

Supplementary Figures S1 and S2:

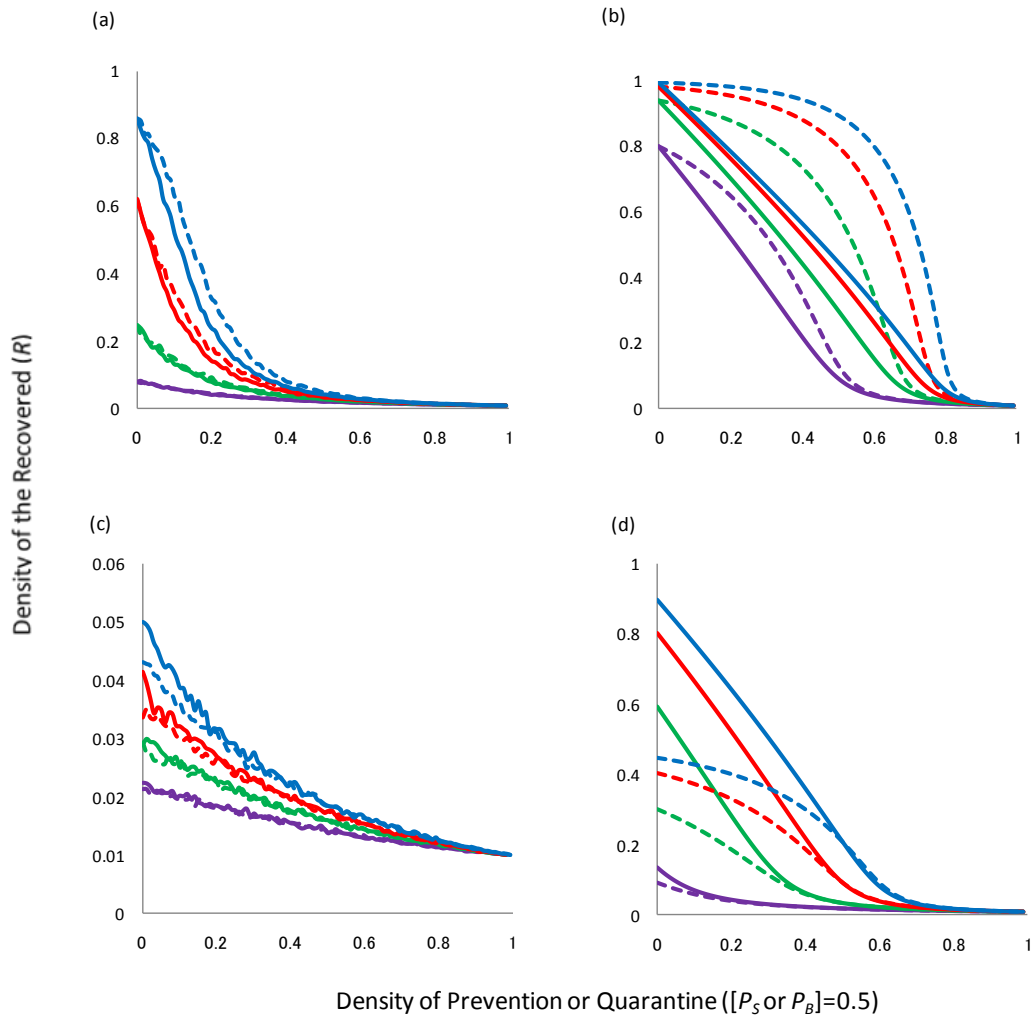

Figure S1. The final density of recovered sites ( $R$ ) for the models of prevention (site percolation)  $P_S$  and/or quarantine (bond percolation)  $P_B$  with various infection rates:  $\beta/\gamma = 2.0$  (purple), 3.0 (green), 4.0 (red) and 5.0 (blue). (a) local simulations and (b) global analyses of either prevention  $P_S$  with  $P_B = 0$  (solid line) or quarantine  $P_B$  with  $P_S = 0$  (dashed line). (c) local simulations and (d) global analyses of either prevention  $P_S$  with  $P_B = 0.5$  (solid line) or quarantine  $P_B$  with  $P_S = 0.5$  (dashed line). Under local interaction, the effects of prevention are always slightly stronger than those of quarantine. Under global interaction, the effects of prevention is moderate, but those of quarantine is weak.

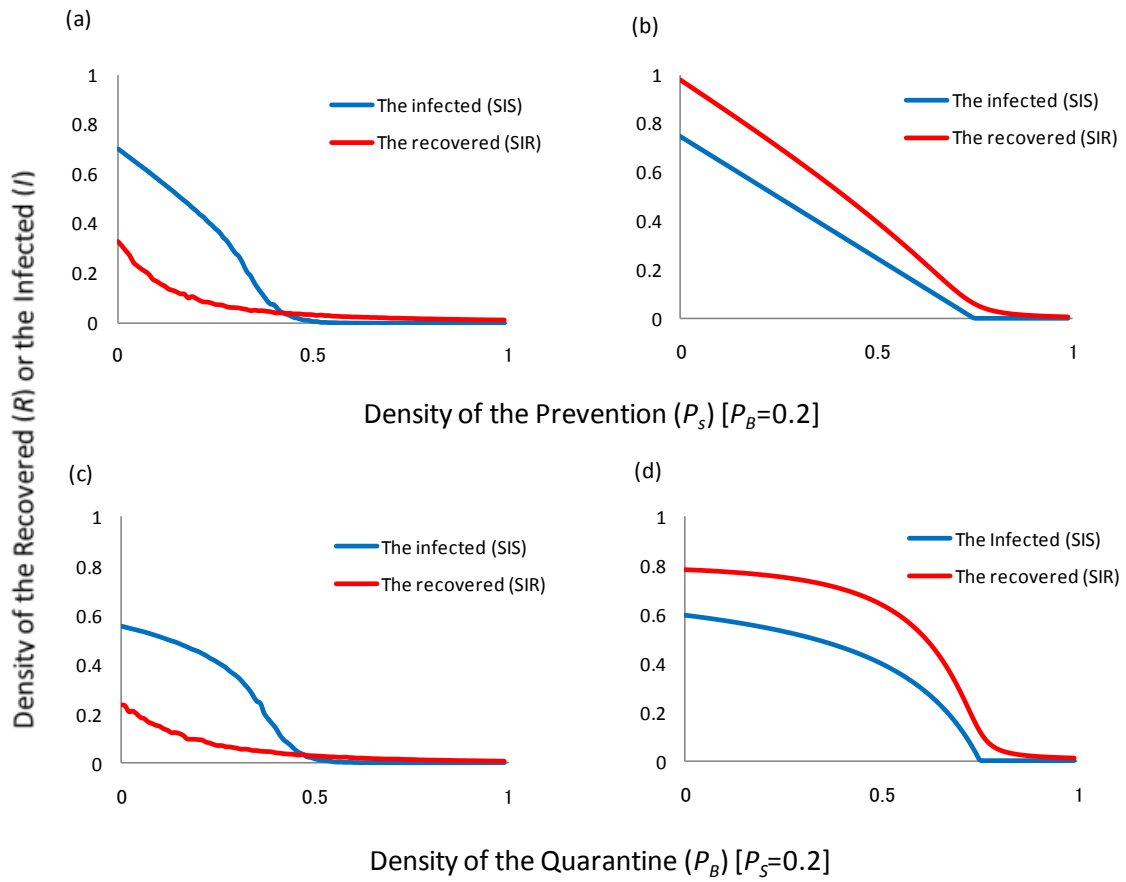

Figure S2. The comparisons of the protection efficiency between the SIR model (the final density of the recovered  $R$  is shown) and the SIS model (the steady state density of the infected  $I$  is shown [Average of 800-1000 steps]). (a) local simulations and (b) global analyses with  $P_B = 0.2$ . (c) local simulations and (d) global analyses with  $P_S = 0.2$ . The effects of both prevention and quarantine are much stronger in SIR than in SIS. However, the effects of these two measures are slightly weaker in SIR than in SIS.
